# Supplementary material for: Behavioral control by depolarized and hyperpolarized states of an integrating neuron
Source: eLife. 2021 Nov 5;10:e67723. doi: 10.7554/eLife.67723 (PMC8570696; doi:10.7554/eLife.67723)
Supplement: Source data 1. — Includes numerical values representing the average frequency of a behavioral event, per animal, per minute, on a single assay plate. [file elife-67723-supp1.xlsx]

## Sheet: DESCRIPTION
Description:
This file includes source data pertaining to all dot plots, with sheets labeled by figure panel.
For behavioral data, each entry represents data recorded on a single assay plate with 12 -15 animals. Each animal was tracked and the number of events within the 4 minute recording was noted.
The numerical value represents the average frequency of a behavioral event, per animal, per minute, on a single assay plate.

## Sheet: Figure2B
Local Search: wild-type	Local Search: RIM glu KO	Local Search: tdc-1	Local Search: RIM glu KO; tdc-1	Global Search: wild-type	Global Search: RIM glu KO	Global Search: tdc-1	Global Search: RIM glu KO; tdc-1
1.61538	1.29333	1.12857	2.18462	0.166667	0.1625	0.171429	0.0666667
1.26154	2	2.34286	1.75385	0.233333	0.133333	0.48	0.106667
1.25333	1.8	1.58333	1.28	0.2	0.228571	0.0769231	0.08
1.11667	1.36	1.87143	1.6	0.214286	0.3	0.2	0.0933333
1.45714	1.64615	1.67143	0.86	0.0857143	0.128571	0.0933333	0.0769231
0.8	1.4	1.76	1.10769	0.0769231	0.353846	0.2	0.24
1.06154	1.68571	1.575	1.2	0.155556	0.133333	0.171429	0.0266667
0.866667	0.971429	1.74286	1.57143	0.213333	0.333333	0.15	0.1
0.885714	2.16	2	1.55556	0.123077	0.0769231	0.166667	0.142857
0.786667	1.61333	2.10667	1.47143	0.153846	0.123077	0.142857	0.106667
1.10667	1.68	1.98667	1.24286	0.153846	0.128571	0.0909091	0.26
1.18667	1.44615	1.78667	1.38462	0.257143	0.142857	0.133333	0.166667
0.7	1.97333	2.16	1.32857	0.213333	0.246154	0.0615385	0.0615385
1.03077	1.91429	2.08	2.33333	0.142857	0.0142857	0.0857143	0.230769
0.775	2.32857	1.8	0.969231	0.153846	0.2	0.353846	0.28
0.728571	1.55556	1.92857	0.985714	0.271429	0.128571	0.215385	0.0571429
0.814286	1.89333	2.07143	1.04615	0.228571	0.230769	0.0833333	0.272727
0.506667	1.02857	1.21333	1.83077	0.307692	0.214286	0.04	0.08
0.666667	1.49333	1.37333	1.08571	0.123077	0.293333	0.173333	0.08
0.714286	1.18333	2.12857	1.78667	0.225	0.338462	0.242857	0.0857143
0.716667	1.44615	1.30667	1.82857	0.146667	0.114286	0.0571429	0.414286
0.815385	1.53846	0.914286	1.58333	0.215385	0.128571	0.0857143	0.0307692
0.571429	0.986667	1.28		0.138462	0.153846	0.285714
0.516667	1.41429	1.98571		0.15	0.213333	0.08

## Sheet: Figure2D
Long Reversals: wild-type	Long Reversals: RIM glu KO	Long Reversals: tdc-1	Long Reversals: RIM glu KO; tdc-1	Short Reversals: wild-type	Short Reversals: RIM glu KO	Short Reversals: tdc-1	Short Reversals: RIM glu KO; tdc-1
1.27692	0.813333	0.5	0.969231	0.430769	0.626667	0.642857	1.33846
1.01538	1.34667	1.11429	1	0.323077	0.746667	1.34286	0.815385
0.628571	1.34286	0.75	0.642857	0.285714	0.5	1.03333	0.842857
0.6	1.44	0.693333	0.328571	0.24	0.92	1.46667	0.728571
0.373333	1.33333	0.813333	0.586667	0.173333	0.426667	1.24	0.76
0.48	1.14667	0.506667	0.653333	0.226667	0.68	0.706667	0.973333
0.973333	0.628571	0.626667	0.571429	0.346667	0.514286	0.746667	0.728571
0.853333	0.96	0.885714	0.569231	0.266667	0.52	1.05714	0.876923
0.853333	0.938462	0.7	0.584615	0.346667	0.815385	1.05714	0.538462
0.416667	1	0.826667	0.938462	0.3	0.676923	0.986667	0.969231
0.514286	1.34667	0.625	0.38	0.242857	0.826667	0.975	0.48
0.766667	1.08	0.693333	0.415385	0.4	0.626667	1.13333	0.738462
1.18571	0.733333	0.706667	0.571429	0.342857	0.566667	1.50667	0.771429
0.615385	0.983333	0.771429	0.357143	0.507692	0.566667	1.42857	0.771429
0.625	0.985714	0.628571	0.733333	0.225	0.771429	1.18571	1.13333
0.45	1.17143	0.984615	0.613333	0.316667	0.985714	1.09231	0.693333
0.492308	1.42857	0.746667	0.628571	0.338462	1.05714	1.36	1.01429
0.461538	0.861538	0.573333	0.755556	0.369231	0.661538	1.29333	0.822222
0.8	0.969231	0.453333	0.92	0.384615	0.630769	0.893333	1.44
0.6	0.5	0.3	0.384615	0.32	0.514286	0.642857	0.584615
0.5	0.866667	0.728571	0.814286	0.257143	0.8	1.31429	1.11429
0.485714	1.44	0.9	0.633333	0.385714	0.666667	1.25714	1.01667
0.385714	0.693333	0.306667		0.185714	0.346667	1
0.316667	0.928571	0.642857		0.216667	0.585714	1.34286

## Sheet: Figure2G
Reversal Omegas: wild-type	Reversal Omegas: RIM glu KO	Reversal Omegas: tdc-1	Reversal Omegas: RIM glu KO; tdc-1	Pure Reversals: wild-type	Pure Reversals: RIM glu KO	Pure Reversals: tdc-1	Pure Reversals: RIM glu KO; tdc-1
0.5097	0.657	0.3145	0.2593	0.3569	0.3844	0.5467	0.6239
0.5861	0.4129	0.2403	0.2712	0.3516	0.3777	0.5515	0.6123
0.4351	0.6086	0.2896	0.2894	0.3579	0.2229	0.4524	0.4561
0.5099	0.412	0.2443	0.1456	0.375	0.4872	0.5906	0.6871
0.5464	0.535	0.2722	0.3945	0.369	0.3697	0.5205	0.547
0.4537	0.5255	0.4433	0.1946	0.4231	0.3388	0.2474	0.6201
0.4413	0.4614	0.1849	0.2574	0.3958	0.6247	0.5403	0.5156
0.3673	0.5565	0.2745	0.2498	0.4457	0.348	0.4336	0.4932
0.4506	0.3743	0.3232	0.3645	0.3388	0.442	0.4996	0.5555
0.4312	0.5406	0.2796	0.3209	0.4249	0.4691	0.5651	0.4725
0.3524	0.438	0.3615	0.4021	0.4357	0.4176	0.4086	0.3664
0.4339	0.4327	0.2039	0.1987	0.4939	0.4742	0.5484	0.6609
0.6128	0.3606	0.1636	0.165	0.2977	0.5688	0.5738	0.6994
0.3154	0.4622	0.2413	0.2283	0.5466	0.4488	0.6542	0.6455
0.6022	0.3207	0.2985	0.1878	0.381	0.5067	0.444	0.6401
0.2625	0.519	0.1071	0.2476	0.5847	0.4305	0.616	0.575
0.4403	0.5072	0.1655	0.3036	0.3819	0.3688	0.5221	0.4807
0.3774	0.4976	0.2433	0.0697	0.4945	0.4472	0.4959	0.7032
0.5868	0.3476	0.1512	0.1017	0.4	0.487	0.6588	0.6571
0.4914	0.5437	0.2194	0.2333	0.422	0.2913	0.6349	0.6258
0.334	0.4483	0.249	0.2776	0.4891	0.4452	0.6533	0.6027
0.3725	0.6098	0.3159	0.2371	0.567	0.3246	0.4683	0.5434
0.3641	0.3662	0.3659		0.3667	0.3341	0.4353
0.2333	0.5136	0.2638		0.6633	0.4051	0.454

## Sheet: Figure2H
wild-type	RIM glu KO	tdc-1	RIM glu KO; tdc-1
121.89	126.334	114.948	96.5874
122.055	126.699	94.799	78.4927
116.013	129.77	106.316	100.749
127.313	119.874	104.739	97.7308
125.323	128.314	105.883	117.416
124.067	127.285	122.688	80.5018
127.341	131.021	118.391	98.7674
125.107	133.043	120.278	109.565
126.971	118.54	112.088	97.6217
127.71	117.413	97.9181	103.892
112.227	119.895	93.1993	110.265
131.881	131.56	112.951	90.2516
130.914	119.033	110.1	104.585
126.959	125.441	107.166	100.604
127.316	126.292	116.136	101.214
112.271	123.284	97.4248	111.753
118.397	120.696	97.7711	110.947
129.011	120.302	99.936	88.7799

## Sheet: Figure2-figuresupplement1A
elt-2p::nGFP; wild-type	elt-2p::nGFP; edited eat-4	elt-2p::nGFP; RIM::nFLP; wild-type
0.983333	0.733333	1.04
1.75385	1.14667	0.986667
0.642857	0.828571	0.842857
1.15385	1.33333	0.8
1.28889	1.04	1.18667
0.942857	1.25333	0.973333
0.875	0.957143	1.2
1.08571	1.45714	1.29333
1.15385
1.05714

## Sheet: Figure2-figuresupplement1B
Long Reversals: elt-2p::nGFP; wild-type	Long Reversals: elt-2p::nGFP; edited eat-4	Long Reversals: elt-2p::nGFP; RIM::nFLP; wild-type	Short Reversals: elt-2p::nGFP; wild-type	Short Reversals: elt-2p::nGFP; edited eat-4	Short Reversals: elt-2p::nGFP; RIM::nFLP; wild-type
0.6	0.4	0.613333	0.416667	0.386667	0.466667
1.18462	0.573333	0.68	0.676923	0.666667	0.373333
0.457143	0.471429	0.414286	0.257143	0.4	0.471429
0.830769	0.706667	0.545455	0.461538	0.68	0.290909
0.844444	0.46	0.72	0.533333	0.64	0.493333
0.628571	0.8	0.64	0.4	0.546667	0.413333
0.525	0.585714	0.783333	0.375	0.428571	0.45
0.7	1.04286	0.786667	0.5	0.542857	0.546667
0.707692			0.538462
0.657143			0.528571

## Sheet: Figure2-figuresupplement1C
elt-2p::nGFP; wild-type	elt-2p::nGFP; edited eat-4	elt-2p::nGFP; RIM::nFLP; wild-type
0.133333	0.24	0.253333
1.03077	0.2	0.28
0.285714	0.285714	0.9
0.430769	0.666667	0.309091
0.377778	1.52	0.333333
0.142857	0.32	0.28
0.85	0.257143	0.383333
0.228571	0.257143	0.24
0.184615
0.4

## Sheet: Figure2-figuresupplement2A
wild-type	tbh-1
1.05714	0.907692
1.13333	1.28333
1.30667	1.55385
0.942857	1
1.74545	1.03077
1.05333
0.857143

## Sheet: Figure2-figuresupplement2B
Long Reversals: wild-type	Long Reversals: tbh-1	Short Reversals: wild-type	Short Reversals: tbh-1
0.571429	0.461538	0.628571	0.538462
0.653333	0.816667	0.546667	0.533333
0.826667	0.938462	0.586667	0.646154
0.485714	0.72	0.6	0.28
1.09091	0.692308	0.745455	0.384615
0.666667		0.413333
0.428571		0.5

[truncated: 26 more sheets: Figure2-figuresupplement2C, Figure2-figuresupplement2L, Figure4C, Figure4D, Figure4-figuresupplement1A, Figure4-figuresupplement1B, Figure4-figuresupplement1H, Figure4-figuresupplement1K, Figure4-figuresupplement2A, Figure5C, Figure5F, Figure5-figuresupplement1A, Figure5-figuresupplement2B, Figure6C, Figure6D, Figure6-figuresupplement1A, Figure6-figuresupplement1E, Figure6-figuresupplement2A, Figure6-figuresupplement2B, Figure6-figuresupplement2C …]
