# Supplementary material for: Behavioral control by depolarized and hyperpolarized states of an integrating neuron
Source: eLife. 2021 Nov 5;10:e67723. doi: 10.7554/eLife.67723 (PMC8570696; doi:10.7554/eLife.67723)
Supplement: Source data 2. [file elife-67723-supp2.xlsx]

## Sheet: DESCRIPTION
Description:
In Figure 5- figure supplement 3, each entry describes RIM calcium imaging data from a single 5 minute-long trace, either at 0-5 minutes or 30-35 minutes after removal of conditioned medium
Figure5-figure supplement 3C: fraction time RIM was ON in each trace
Figure5-figure supplement 3D: count of RIM transitions to the ON state in each trace
Figure5-figure supplement 3E: mean change in GCaMP fluorescence between the OFF and ON states for each trace

## Sheet: Figure5-figuresupplement3C
0-5 min: wild-type	0-5 min: RIM::HisCl	30-35: wild-type	30-35: HisCl
0.71057	0.671891	0.321107	0.271757
0.758253	0.0206736	0.561521	0.634545
0.775925	0.306769	0.599533	0.676892
0.688563	0.79093	0.58086	0.476826
0.784261	0.650884	0.21007	0.503501
0.830277	0.116372	0.798266	0.616539
0.827943	0.681227	0.859953	0.552851
0.862954	0.446816	0.804268	0.474491
0.866622	0.262421	0.647216	0.484161
0.666889	0.812938	0.486162	0.0553518
0.77926	0.542181	0.780927	0.81994
0.710904	0.497166	0.727576	0.136379
0.587196	0.0506836	0.200734	0.0416806
0.890964	0.708903	0.182394	0.498499
0.785595	0.224742	0.334111	0.858286
0.747916	0.491831	0.863621	0.583528
0.385795	0.821607	0.120373	0.718239
0.702901	0.0760253	0.243748	0.148716
0.734912	0.605535	0.205735
0.374458	0.664888	0.405802
0.603535	0.517839	0.276759
0.791264	0.738246
0.860287
0.846949
0.792264
0.66122
0.408803
0.691564
0.927976
0.51117
0.772257

## Sheet: Figure5-figuresupplement3D
0-5 min: wild-type	0-5 min: RIM::HisCl	30-35: wild-type	30-35 min: RIM::HisCl
5	1	2	0
4	0	3	5
2	2	2	2
3	4	2	3
3	1	1	1
2	1	4	1
5	1	4	0
4	1	9	2
3	1	4	1
1	1	3	1
4	1	2	2
0	1	1	0
2	1	2	1
4	0	1	1
3	0	1	4
4	1	5	1
1	1	1	1
1	0	1	1
1	0	2
2	1	2
5	2	3
2	0
3
1
9
1
2
4
2
4
7

## Sheet: Figure5-figuresupplement3E
0-5 min: wild-type	0-5 min: RIM::HisCl	30-35 min: wild-type	30-35 min: RIM::HisCl
34.3654	57.5199	31.1487	15.8005
58.7147	53.2965	57.3501	26.6013
16.5502	43.4258	18.7555	25.3477
20.3252	31.2612	49.5709	80.5944
67.7808	66.7878	51.9257	18.9554
33.8156	84.0184	25.9803	27.5783
44.0503	22.7974	19.2682	18.0839
13.5503	31.4169	12.8556	93.355
18.5732	35.6332	38.481	63.7092
95.4598	16.8673	45.3297	25.4711
36.6412	39.8095	24.1369	13.0979
15.0114	23.7706	30.6321	17.4479
12.7386	59.5503	43.5538	18.6248
11.951	18.3367	92.8801	18.3883
31.1095	18.4146	70.0414	10.2125
30.3337	40.742	17.3514	25.6674
40.0784	21.0465	21.0555	41.6619
31.9441	8.70547	49.7779	28.7194
91.5265	52.407	37.9544
18.0576	69.9015	56.7169
58.0209	28.284	60.1858
28.5456	18.1513
31.4493
44.8743
9.43065
63.3161
30.8576
15.5692
45.6969
67.2419
18.3282
